# Supplementary material
Source: publisher figshare collection journal article supplement (https://acs.figshare.com/ndownloader/files/4638316)
Supplement: Supplementary file 1 [file 4638316]

# Supporting information

## High performance mesoporous bioceramics mimicking bone mineralization

### *N<sub>2</sub> adsorption porosimetry and powder XRD characterization*

Figure S1 shows the isotherms obtained by N<sub>2</sub> adsorption porosimetry and small-angle XRD patterns corresponding to mesoporous bioactive glasses (MBG) S58m and S85m. The isotherms exhibit a capillary condensation step in the adsorption branch at high relative pressure  $P/P_0$  equal to 0.60-1.0 and 0.50-0.60 for S58m and S85m, respectively. Both isotherms show H1 hysteresis loops, which are characteristics of cylindrical pores open at both ends. The pore diameters calculated by BJH method are 9.45 and 5.73 nm, respectively. Small-angle XRD pattern corresponding to the sample S58m glass shows a unique maximum at  $2\theta = 1.28^\circ$ . This pattern is consistent with a 2D-hexagonal structure with 1d pore channels oriented parallel, which was later confirmed by TEM studies. Small-angle XRD pattern of S85m sample shows one intense maximum at  $2\theta = 1.20^\circ$ , which can be indexed as 211 reflection of a cubic system. Other small peaks can be indexed as 220, 400 and 332 reflections at higher scattering angle based on Transmission Electron Microscopy (TEM) even though there are small structural deviations. The unit cell parameter calculated from 211 peak positions is 180 Å.

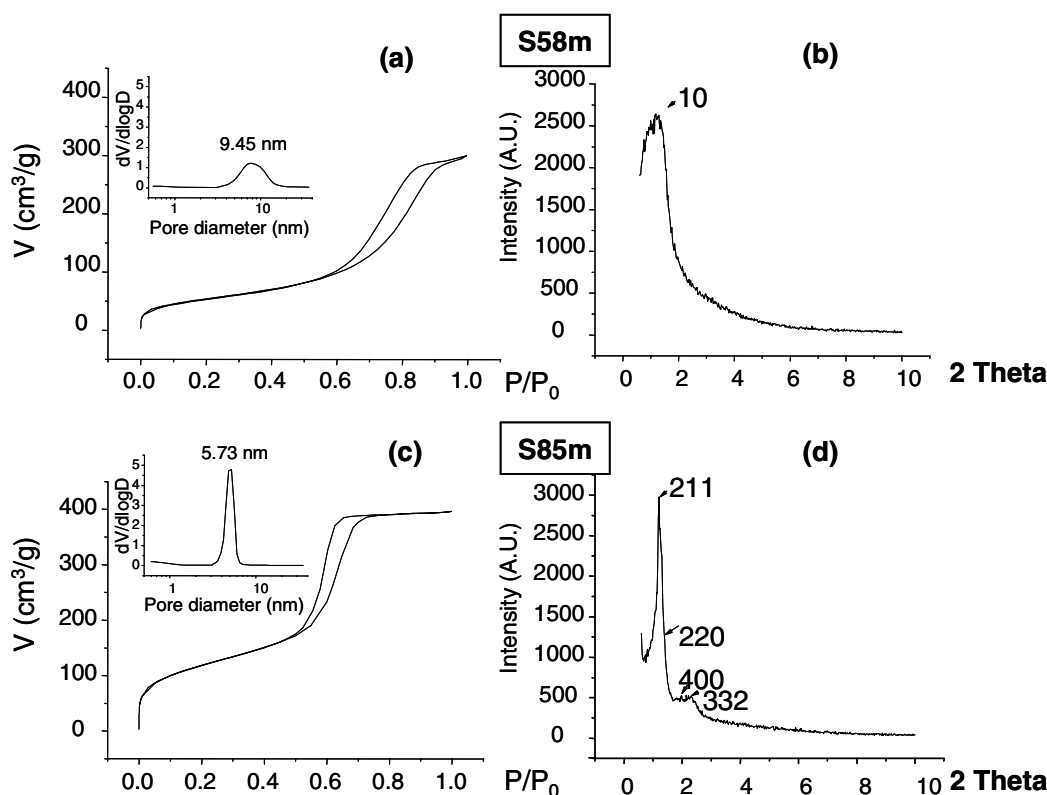

Figure S1:  $N_2$  adsorption isotherms and pore size distribution of (a) S58m and (c) S85m. XRD patterns of (b) S58m and (d) S85m are also displayed.

### High Resolution Transmission Electron microscopy of the mesoporous glasses

In order to make a nano-structure study of the pore wall constituting mesoporous arrangement, high resolution transmission electron microscopy was performed. Figure S2 shows such characterization on the pore wall corresponding to S58m and S85m samples. HRTEM images show that pore walls are constituted by an amorphous phase in both cases. Fourier patterns confirmed this point, showing the characteristic halo of amorphous materials. EDX experiment carried out over different areas indicated the homogeneous chemical distribution within the pore walls. For S58m sample, the composition is silicon  $60.2 \pm 0.5$ , phosphorous  $5.4 \pm 0.7$  and calcium  $34.4 \pm 0.2$  (% in atoms) and in the case S85m sample, the composition is silicon  $85.1 \pm 0.3$ , phosphorous  $4.3 \pm 0.3$  and calcium  $10.6 \pm 0.5$  (% in atoms). No

crystalline nuclei of calcium phosphates or silicates were observed neither within the hexagonal (S58m) nor the cubic phase (S85m).

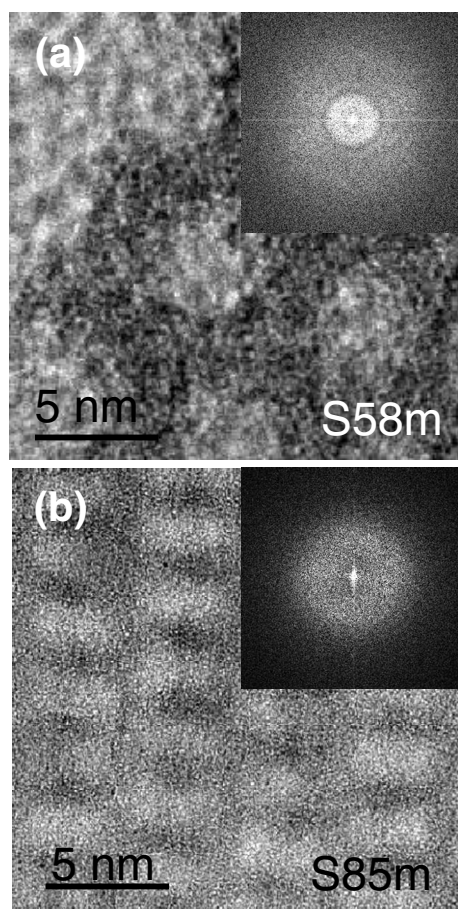

Figure S2: HRTEM images together with their corresponding Fourier diffractograms of pore wall of S58m and S85m, respectively.

### Electron crystallography: 3D reconstruction of bicontinuous mesoporous glass S85m.

Electron Crystallography (EC) is very powerful tool that provides direct information on the detailed structured inside of the mesoporous crystal such as diameter, shape, and connectivity of the pores. Since all these parameters will play a fundamental role on the biological fluids diffusion when implanted, a deep comprehension of their structure must be acquired before their clinical application.

Crystal structure factors obtained by electron crystallography of S85m sample

| hkl | $h^2+k^2+l^2$ | d[nm] | F (hkl) |
|-----|---------------|-------|---------|
| 211 | 6             | 73.48 | -100    |
| 220 | 8             | 63.64 | -45.75  |
| 321 | 14            | 48.11 | 5.80    |
| 400 | 16            | 45.00 | 10.27   |
| 420 | 20            | 40.25 | -5.02   |
| 332 | 22            | 38.38 | -3.21   |
| 431 | 26            | 35.30 | -0.13   |
| 440 | 32            | 31.82 | -0.78   |
| 532 | 38            | 29.20 | -0.66   |
| 611 | 38            | 29.20 | -0.67   |
| 620 | 40            | 28.46 | -0.29   |
| 541 | 42            | 27.77 | -0.63   |
| 444 | 48            | 25.98 | 0.88    |
| 640 | 52            | 24.96 | 0.58    |
| 552 | 54            | 24.49 | 0.64    |
| 633 | 54            | 24.49 | 0.18    |
| 642 | 56            | 24.05 | 0.19    |
| 820 | 68            | 21.83 | -0.24   |
